# Supplementary material for: Skeletal development is regulated by fibroblast growth factor receptor 1 signalling dynamics
Source: Oxford University Press journal article supplement (doi:10.1242/dev.00940), 2003-12-16
Supplement: dev00940supptables.pdf [file dev00940supptables.pdf]

**Table S1. Tabulation of skeletal analysis for BAC15 mice**

|            |               |     |      | Craniofacial defects |              |            |      |            | Sternum              | Limbs      |
|------------|---------------|-----|------|----------------------|--------------|------------|------|------------|----------------------|------------|
| Genotype   | Code          | Age | Sex  | Sutures              | Bony Isl.    | Zygo. Fus. | Face | O.g. Teeth | Fusion               | L/R (Type) |
| Wild type  | Tg83-3/3-b.3  | P4  | n.d. | —                    | —            | —          | —    | —          | —                    | —          |
|            | Tg83-3/3-c.1  | P4  | n.d. | —                    | —            | —          | —    | —          | —                    | —          |
|            | Tg83-3/3-c.2  | P4  | n.d. | —                    | —            | —          | —    | —          | —                    | —          |
|            | Tg83-3/6B-a.4 | P6  | n.d. | —                    | Y            | —          | —    | —          | —                    | —          |
|            | Tg83-3/6B-a.9 | P6  | n.d. | —                    | Y            | —          | —    | —          | —                    | —          |
|            | Tg83-3/3-a.1  | P6  | n.d. | —                    | —            | —          | —    | —          | —                    | —          |
|            | Tg83-3/6B-a.9 | P6  | n.d. | —                    | Y            | —          | —    | —          | —                    | —          |
| Total = 7  |               |     |      |                      |              |            |      |            |                      |            |
| 1C-BAC15   | Tg83-3/3-b.1  | P4  | n.d. | —                    | —            | —          | —    | —          | —                    | —          |
|            | Tg83-3/3-b.2  | P4  | n.d. | —                    | —            | —          | —    | —          | —                    | —          |
|            | Tg83-3/3-b.5  | P4  | n.d. | —                    | —            | —          | —    | —          | —                    | —          |
|            | Tg83-3/3-b.7  | P4  | n.d. | —                    | —            | —          | —    | —          | —                    | —          |
|            | Tg83-3/3-c.4  | P4  | n.d. | —                    | —            | —          | —    | —          | —                    | —          |
|            | Tg83-3/6B-a.1 | P6  | n.d. | —                    | Y            | —          | —    | —          | —                    | —          |
|            | Tg83-3/6B-a.2 | P6  | n.d. | —                    | Y            | —          | —    | —          | —                    | —          |
|            | Tg83-3/6B-a.3 | P6  | n.d. | —                    | Y            | —          | —    | —          | —                    | —          |
|            | Tg83-3/6B-a.5 | P6  | n.d. | —                    | Y (v. small) | —          | —    | —          | —                    | —          |
|            | Tg83-3/6B-a.7 | P6  | n.d. | —                    | Y            | —          | —    | —          | "Y, rib misaligned"  | —          |
| Total = 10 |               |     |      |                      |              |            |      |            |                      |            |
| 2C-BAC15   | Tg83-3/3-a.2  | P6  | n.d. | —                    | —            | —          | —    | —          | —                    | —          |
|            | Tg83-3/3-a.3  | P6  | n.d. | —                    | —            | —          | —    | —          | 4+5                  | —          |
|            | Tg83-3/3-a.4  | P6  | n.d. | —                    | —            | —          | —    | —          | —                    | —          |
|            | Tg83-3/3-b.4  | P4  | n.d. | —                    | —            | —          | —    | —          | —                    | —          |
|            | Tg83-3/3-b.5  | P4  | n.d. | —                    | —            | —          | —    | —          | —                    | —          |
|            | Tg83-3/3-c.3  | P4  | n.d. | —                    | —            | —          | —    | —          | —                    | —          |
|            | Tg83-3/6B-a.6 | P6  | n.d. | —                    | Y            | —          | —    | —          | "4+5, ribs abnormal" | —          |
| Total = 7  |               |     |      |                      |              |            |      |            |                      |            |
| 3C-BAC15   | Tg83-3/6B-a.8 | P6  | n.d. | —                    | Y            | —          | —    | —          | —                    | —          |
| Total = 1  |               |     |      |                      |              |            |      |            |                      |            |

Wild Type are litter mates of 2C- and 4C- transgenic mice.

n.d., not determined; —, no phenotype; Y, yes; Bony Isl., bony islands; Zygo. Fus., zygomatic fusion; O.g., over grown teeth; R, right; L, left.

For sternal defects: numbers indicate which sternabrae were fused.

Limb L/R, Hind-limb polydactyly with sides of occurrence indicated as L, left and/or, R, right.

For BAC15 data, 3C-BAC15 is derived from breeding 1C and 2C founders.

**Table S2. Tabulation of skeletal analysis for BAC16 mice**

|            |                |            |      | Craniofacial defects |           |                    |                      |               | Sternum     | Limbs        |
|------------|----------------|------------|------|----------------------|-----------|--------------------|----------------------|---------------|-------------|--------------|
| Genotype   | Code           | Age        | Sex  | Sutures              | Bony Isl. | Zygo. Fus.         | Face                 | O.g. Teeth    | Fusion      | L/R (Type)   |
| Wild type  | Tg90-3/2A-a.2  | P1         | n.d. | –                    | Y         | –                  | –                    | –             | 4+5         | –            |
|            | Tg90-3/8G-b.8  | P24        | n.d. | Bridged              | Y         | –                  | –                    | –             | –           | –            |
|            | Tg90-3/8G-b.10 | P24        | n.d. | –                    | –         | –                  | –                    | –             | –           | –            |
|            | Tg90-3/8A-a.6  | 2 months   | F    | –                    | –         | n.d.               | –                    | –             | n.d.        | –            |
| Total = 4  |                |            |      |                      |           |                    |                      |               |             |              |
| 1C-BAC16   | Tg90-3/11H.5   | E18.5      | n.d. | –                    | Y         | –                  | –                    | n.a.          | –           | –            |
|            | Tg90-3/8G-b.3  | P8         | M    | Fused                | Y         | Unilateral         | –                    | –             | –           | –            |
|            | Tg90-3/8G-b.4  | P8         | F    | Bridged              | Y         | Ant. only          | Curv.                | –             | 4+5         | –            |
| Total = 3  |                |            |      |                      |           |                    |                      |               |             |              |
| 2C-BAC16   | Tg90-3/11H.2   | E18.5      | n.d. | –                    | Y         | –                  | –                    | n.a.          | 4+5         | –            |
|            | Tg90-3/11H.3   | E18.5      | n.d. | –                    | Y         | –                  | –                    | n.a.          | 4+5         | –            |
|            | Tg90-3/2A-a.1  | P1         | n.d. | –                    | Y         | –                  | –                    | –             | –           | –            |
|            | Tg90-3/2A-a.3  | P1         | n.d. | –                    | –         | –                  | –                    | –             | –           | –            |
|            | Tg90-3/2A-a.5  | P1         | n.d. | –                    | –         | –                  | –                    | –             | –           | –            |
|            | Tg90-3/2A-a.10 | P1         | n.d. | –                    | Y         | –                  | –                    | –             | 4+5         | –            |
|            | Tg90-3/2A-a.11 | P1         | n.d. | –                    | Y         | –                  | –                    | –             | –           | –            |
|            | Tg90-3/2B-b.1  | P7         | n.d. | Fused                | Y         | Ant. only          | –                    | –             | 4+5         | –            |
|            | Tg90-3/2B-b.5  | P7         | n.d. | Fused                | Y         | Ant. only          | –                    | –             | 4+5         | –            |
|            | Tg90-3/8G-a.6  | P24        | n.d. | –                    | –         | –                  | –                    | –             | –           | –            |
|            | Tg90-3/8G-a.7  | P24        | n.d. | Bridged              | Y         | –                  | –                    | –             | 4+5         | –            |
|            | Tg90-3/8G-a.9  | P24        | n.d. | –                    | –         | –                  | –                    | –             | 4+5         | –            |
|            | Tg90-3/8B-a.5  | 1.5 months | F    | Bridged              | –         | n.d.               | –                    | Upp. Incisors | n.d.        | L+R (I)      |
|            | Tg90-3/8A-a.2  | 2 months   | M    | Bridged              | –         | n.d.               | –                    | –             | n.d.        | R            |
|            | Tg90-3/8C-a.2  | 2 months   | M    | Bridged              | Y         | Ant. only          | –                    | –             | 4+5         | Curved       |
|            | Tg90-3/3I-a.8  | 5 months   | F    | n.d.                 | –         | –                  | –                    | –             | 4+5         | R (III)      |
| Total = 15 |                |            |      |                      |           |                    |                      |               |             |              |
| 4C-BAC16   | Tg90-3/11H.1   | E18.5      | n.d. | Closer appos.        | Y         | –                  | –                    | n.a.          | Extra 5+4+5 | R (II)       |
|            | Tg90-3/11H.4   | E18.5      | n.d. | Closer appos.        | Y         | Ant. only          | –                    | n.a.          | 4+5         | R (I)        |
|            | Tg90-3/2B-b.2  | P7         | n.d. | Fused                | Y         | Ant. only          | Slight Curv.; S. Max | –             | 4+5         | R (slight I) |
|            | Tg90-3/2B-b.3  | P7         | n.d. | Fused                | Y         | Ant. only          | –                    | –             | 4+5         | L+R (I+III)  |
|            | Tg90-3/2B-b.4  | P7         | n.d. | Bridged              | –         | Ant.+ post.        | –                    | –             | 4+5         | R (II)       |
|            | Tg90-3/2B-b.6  | P7         | n.d. | Bridged              | –         | Ant. only          | Curv.; S. Max        | –             | 1+2; 4+5    | R (IV)       |
|            | Tg90-3/8G-a.1  | P8         | M    | Fused                | Y         | R. ant only/L.both | –                    | –             | 4+5         | L+R (I+III)  |
|            | Tg90-3/8G-a.2  | P8         | F    | Fused                | Y         | Ant.+ post.        | –                    | –             | 1+2; 4+5    | L+R (I+III)  |
|            | Tg90-3/8G-a.5  | P24        | n.d. | Fused                | Y         | Ant. only          | Curv.                | Upp. Incisors | 4+5         | –            |
|            | Tg90-3/8B-a.4  | 1.5 months | F    | Bridged              | –         | n.d.               | Slight Curv.         | Upp. Incisors | n.d.        | L+R (I+III)  |
|            | Tg90-3/4-a.1   | 2 months   | M    | Bridged              | Y         | n.d.               | Slight Curv.         | Upp. Incisors | 4+5         | –            |
|            | Tg90-3/7A-a.5  | 2 months   | F    | Bridged              | –         | Ant.+ post.        | Short Max.           | Upp. Incisors | 1+2; 3+4+5  | L (I)        |
|            | Tg90-3/7B-a.1  | 2 months   | M    | n.d.                 | Y         | Ant.+ post.        | –                    | Upp. Incisors | 1+2; 4+5    | L+R (I+III)  |
|            | Tg90-3/8A-a.1  | 2 months   | M    | Fused                | Y         | n.d.               | Curv. Left           | Upp. Incisors | n.d.        | L+R          |
|            | Tg90-3/8C-a.1  | 2 months   | M    | –                    | Y         | Ant.+ post.        | Short Max.           | Upp. Incisors | 4+5         | R (I)        |
|            | Tg90-3/3D-a.1  | 2.5 months | M    | –                    | –         | Ant. only          | –                    | Upp. Incisors | 4+5         | L+R (I+II)   |
|            | Tg90-3/3D-a.2  | 2.5 months | M    | Fused                | –         | Ant.+ post.        | –                    | Upp. Incisors | Rib mis 4+5 | R (II)       |
|            | Tg90-3/2B-c.2  | 3.5 months | M    | n.d.                 | –         | Ant. only          | Curv. Left           | Upp. Incisors | 4+5         | L+R (I+III)  |
|            | Tg90-3/3D-a.7  | 4 months   | F    | Bridged              | –         | n.d.               | Curv. Right          | Upp. Incisors | n.d.        | n.d.         |
|            | Tg90-3/3A-a.4  | 10 months  | F    | n.d.                 | –         | Ant. only          | Mild Left Curv.      | Upp. Incisors | 4+5         | R (III)      |
|            | Tg90-3/7C-a.1  | 13 months  | M    | n.d.                 | Y         | Ant. only          | Curv.; S. Max        | Upp. Incisors | 4+5         | –            |
|            | Tg90-3/7C-a.5  | 13 months  | F    | Fused                | –         | Ant. only          | –                    | –             | 1+2; 4+5    | L (II)       |
| Total = 21 |                |            |      |                      |           |                    |                      |               |             |              |

Wild type are litter mates of 2C- and 4C-transgenic mice.

n.a., not applicable; n.d., not determined; –, no phenotype; Y, yes; Bony Isl., bony islands; Zygo. Fus., zygomatic fusion; Ant., anterior; post., posterior; R, right; L, left; O.g., over grown teeth; Upp., upper.

For facial defects: Curv., curved (with side indicated); S. Max., short maxilla.

For sternal defects: numbers indicate which sternabrae were fused; Rib mis., rib misalignment (as in Fig. 4C).

Limb L/R, Hind-limb polydactyly with sides of occurrence indicated as L, left and/or, R, right.

The type/combinations of polydactyly observed are indicated by symbols I to IV. Each type, I, II, III and IV, is depicted in Fig. 5, in parts F, D, H, and J, respectively.

**Table S3. Candidate genes governing limb development and polydactyly**

| Gene           | E10-E10.5 | E11-E11.5 | E12-E12.5 |
|----------------|-----------|-----------|-----------|
| <i>Alx4</i>    | +         |           |           |
| <i>Bmp2</i>    |           | +         |           |
| <i>Bmp4</i>    | +         | +         |           |
| <i>BmpRI-B</i> |           | +         |           |
| <i>Cdx1</i>    | -         | -         |           |
| <i>CdX2</i>    | -         | -         |           |
| <i>Dkk1</i>    |           | +         | +         |
| <i>Fgf4</i>    | +         | +         | +         |
| <i>Fgf8</i>    | +         |           |           |
| <i>Fgfr1</i>   | +         |           |           |
| <i>Gli3</i>    | +         | +         |           |
| <i>Gremlin</i> |           | +         |           |
| <i>dHAND</i>   | +         | +         |           |
| <i>Hoxd12</i>  |           | +         |           |
| <i>Hoxd13</i>  |           | +         | +         |
| <i>Lmbr1</i>   | -         | -         |           |
| <i>Lef1</i>    |           | +         |           |
| <i>Msx1</i>    |           | +         |           |
| <i>Msx2</i>    |           | +         |           |
| <i>Sall1</i>   | +         |           |           |
| <i>Shh</i>     | +         | +         |           |
| <i>Twist</i>   | +         | +         |           |
| <i>Wnt5a</i>   |           | +         |           |

List of genes whose expression was examined in wild-type, 2C- and 4C-BAC16 embryonic mice in this study. Studies of engineered or spontaneous mutations (Biesecker, 2002) have implicated a subset of such genes in polydactyly.

+, embryonic stages examined where expression was detected.

-, stages examined where no expression was detected.

Blanks represent stages that were not studied.

A minimum of two embryos were examined at each stage indicated.
